# Supplementary material for: Plasmonic Ru/hydrogen molybdenum bronzes with tunable oxygen vacancies for light-driven reduction of p-nitrophenol
Source: Royal Society of Chemistry journal article supplement (doi:10.1039/c8ta11604k), 2019-01-01
Supplement: c8ta11604k1.pdf [file c8ta11604k1.pdf]

## Supporting Information

### **Plasmonic Ru/Hydrogen Molybdenum Bronze with Tunable Oxygen Vacancies for Light-Driven Reduction of *p*-Nitrophenol**

*Haibo Yin,<sup>a</sup> Yasutaka Kuwahara,<sup>ab</sup> Kohsuke Mori,<sup>abc</sup> Michel Che,<sup>d</sup>  
and Hiromi Yamashita<sup>ab\*</sup>*

<sup>a</sup> Division of Materials and Manufacturing Science, Graduate School of Engineering, Osaka University, Osaka, 565-0871, Japan.

<sup>b</sup> Unit of Elements Strategy Initiative for Catalyst & Batteries (ESICB), Kyoto University, Kyoto, 615-8245, Japan.

<sup>c</sup> JST, PRESTO, 4-1-8 HonCho, Kawaguchi, Saitama, 332-0012, Japan.

<sup>d</sup> Institut Universitaire de France and Laboratoire de Réactivité de Surface, Université Pierre et Marie Curie-Paris 6 (France)

\*Corresponding Author

E-mail: yamashita@mat.eng.osaka-u.ac.jp

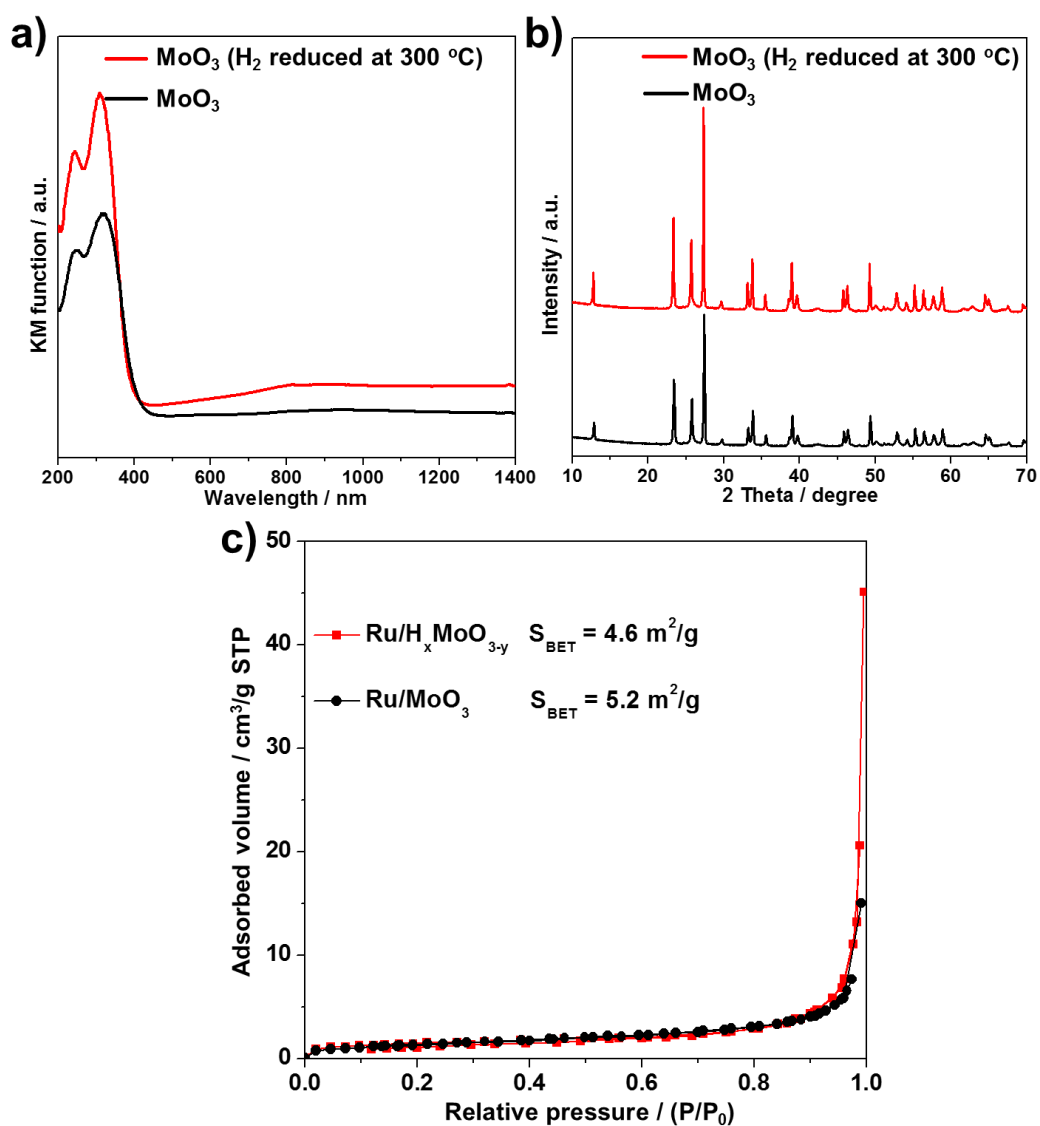

**Figure S1.** a) UV-vis-NIR diffuse reflectance spectra and b) XRD patterns of the  $\text{MoO}_3$  before and after  $\text{H}_2$  reduction at 300 °C. c)  $\text{N}_2$  adsorption-desorption isotherms of  $\text{Ru}/\text{MoO}_3$  and  $\text{Ru}/\text{H}_x\text{MoO}_{3-y}$  hybrid.

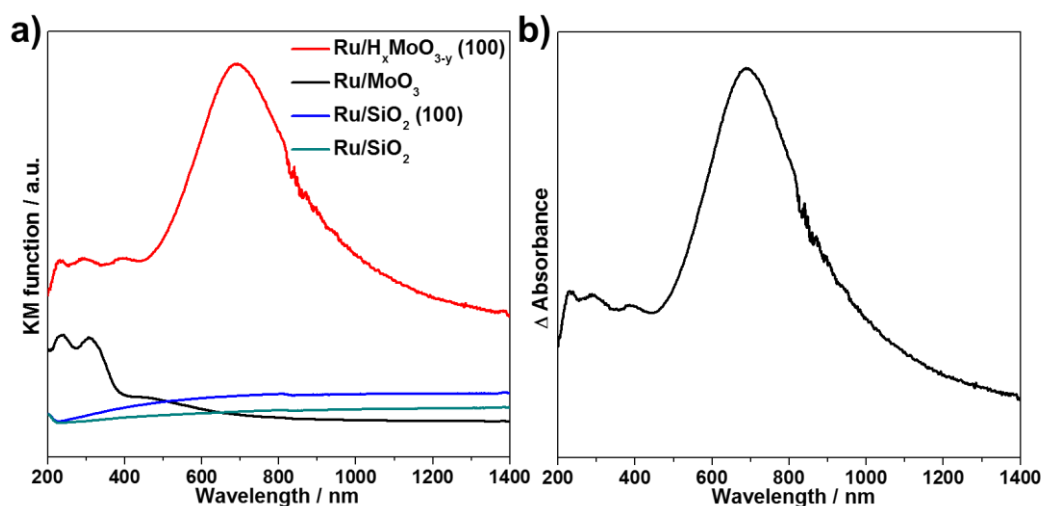

**Figure S2.** a) UV-vis-NIR diffuse reflectance spectra of the Ru/MoO<sub>3</sub> and Ru/SiO<sub>2</sub> hybrids before and after H<sub>2</sub> reduction at 100 °C. b) The absorbance different between the Ru/MoO<sub>3</sub> and Ru/SiO<sub>2</sub> hybrids after H<sub>2</sub> reduction at 100 °C through subtraction of their corresponding UV-vis-NIR diffuse reflectance spectra in a).

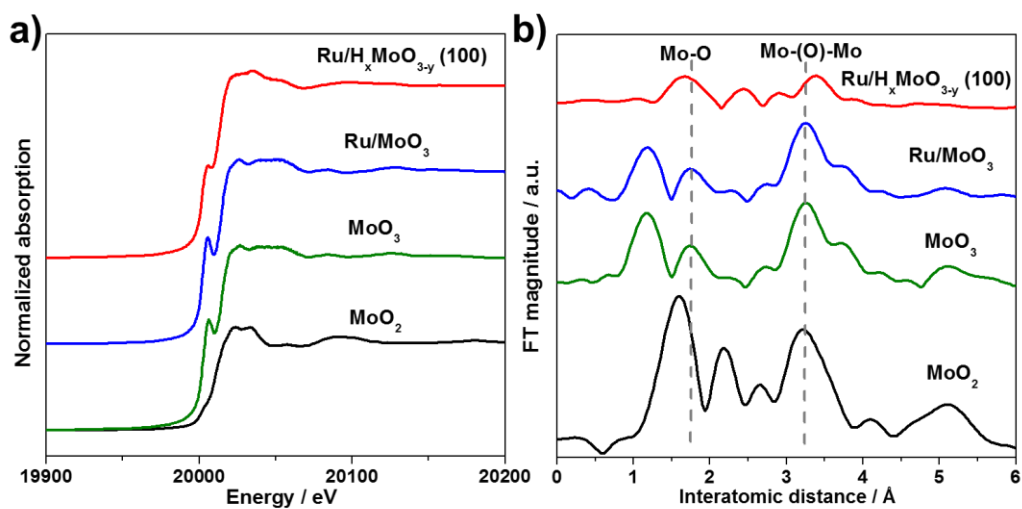

**Figure S3.** a) Mo *K*-edge XANES and b) FT-EXAFS spectra for the Ru/MoO<sub>3</sub> samples before and after H<sub>2</sub> reduction and reference materials (MoO<sub>3</sub> and MoO<sub>2</sub>).

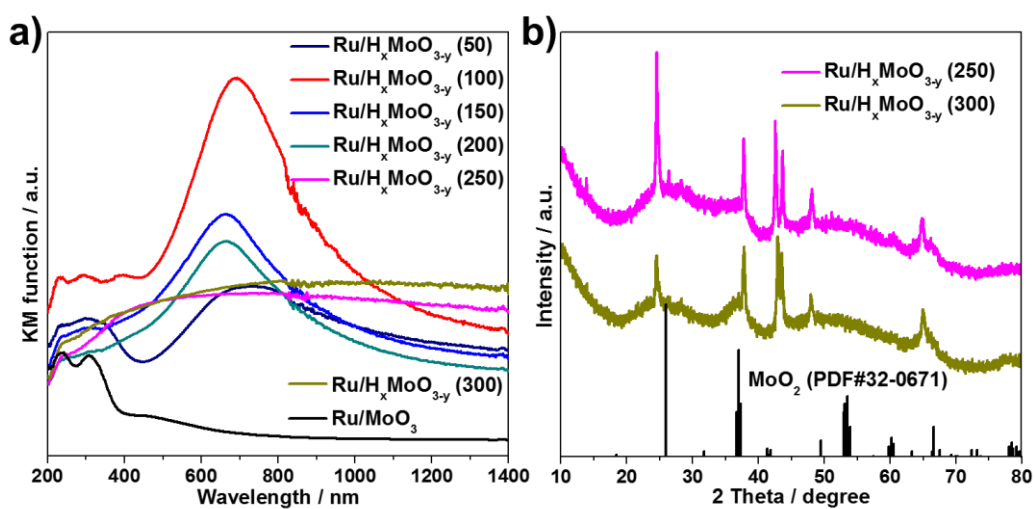

**Figure S4.** a) UV-vis-NIR diffuse reflectance spectra of Ru/MoO<sub>3</sub> samples after H<sub>2</sub> reduction at different temperatures. b) XRD patterns of the Ru/H<sub>x</sub>MoO<sub>3-y</sub> (250 and 300).

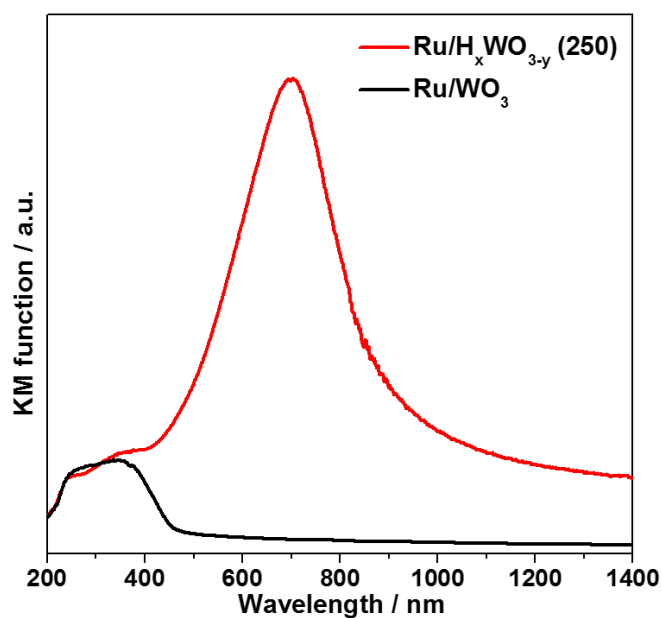

**Figure S5.** UV-vis-NIR diffuse reflectance spectra of Ru/WO<sub>3</sub> before and after H<sub>2</sub> reduction at 250 °C, respectively.

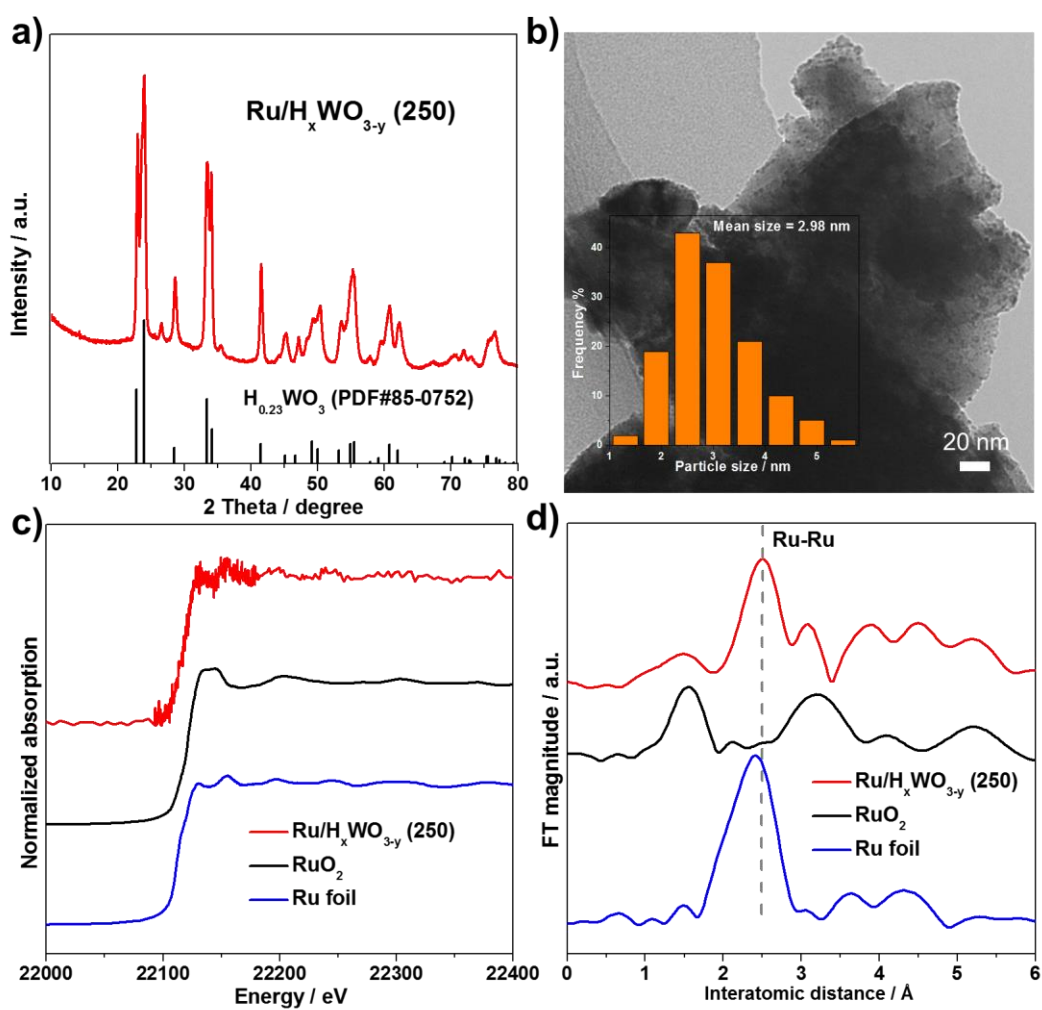

**Figure S6.** a) XRD patterns of the Ru/H<sub>x</sub>WO<sub>3-3-y</sub> (250). b) TEM image of the Ru/WO<sub>3</sub> after H<sub>2</sub> reduction at 250 °C and (inset) the corresponding particle size distribution of Ru NPs. c) Ru K-edge XANES and d) FT-EXAFS spectra for the Ru/WO<sub>3</sub> after H<sub>2</sub> reduction at 250 °C and reference materials (Ru foil and RuO<sub>2</sub>)

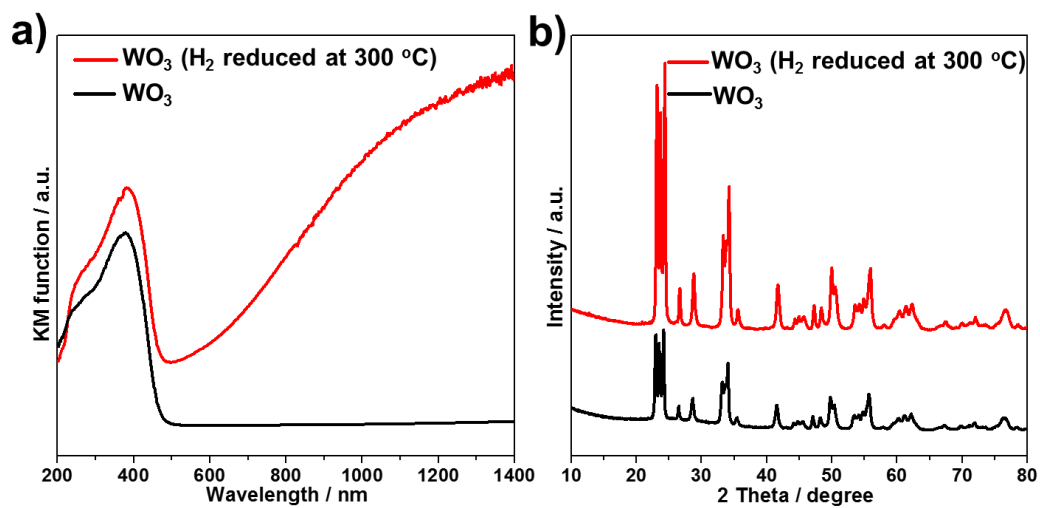

**Figure S7.** a) UV-vis-NIR diffuse reflectance spectra and b) XRD patterns of the WO<sub>3</sub> before and after H<sub>2</sub> reduction at 300 °C.

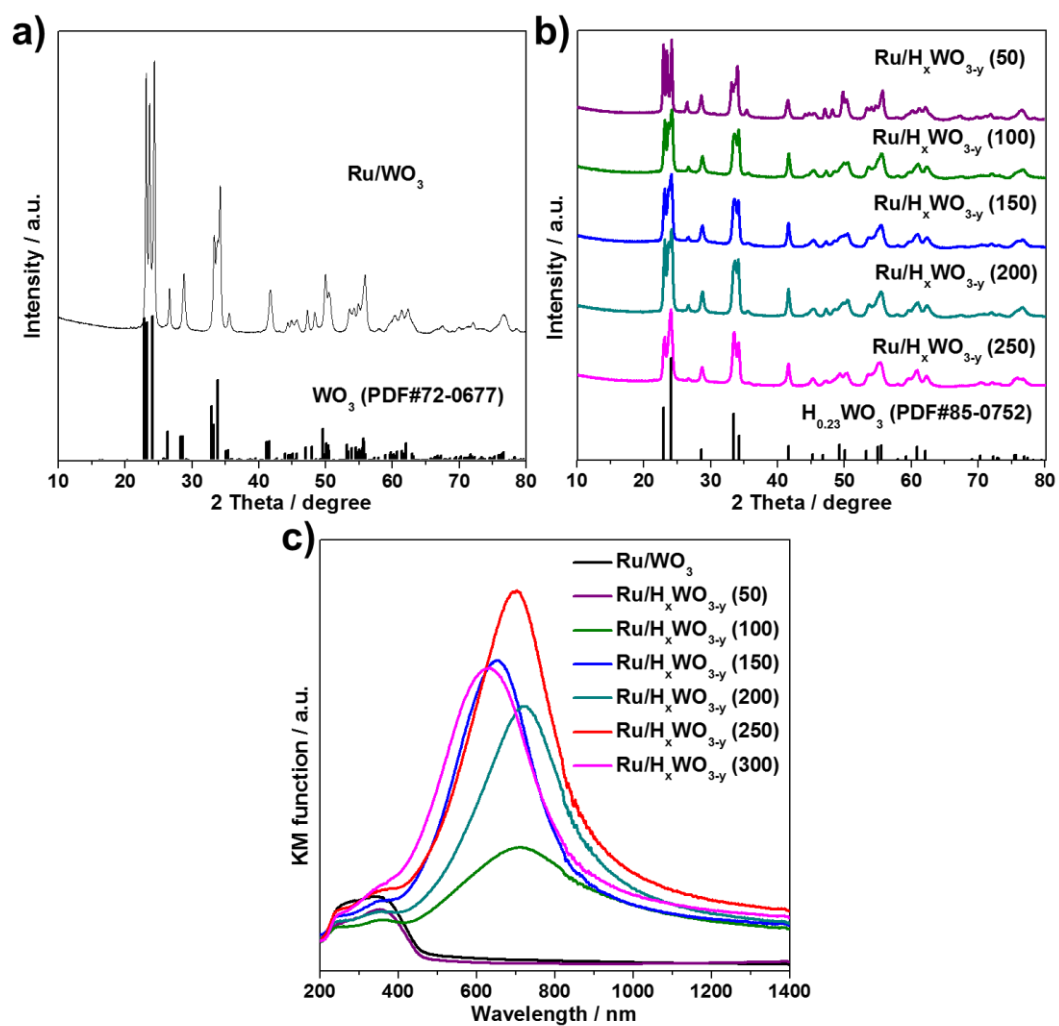

**Figure S8.** XRD patterns of a) the Ru/WO<sub>3</sub> and b) Ru/WO<sub>3</sub> samples after H<sub>2</sub> reduction at different temperatures. c) UV-vis-NIR diffuse reflectance spectra of Ru/WO<sub>3</sub> samples before and after H<sub>2</sub> reduction at different temperatures.

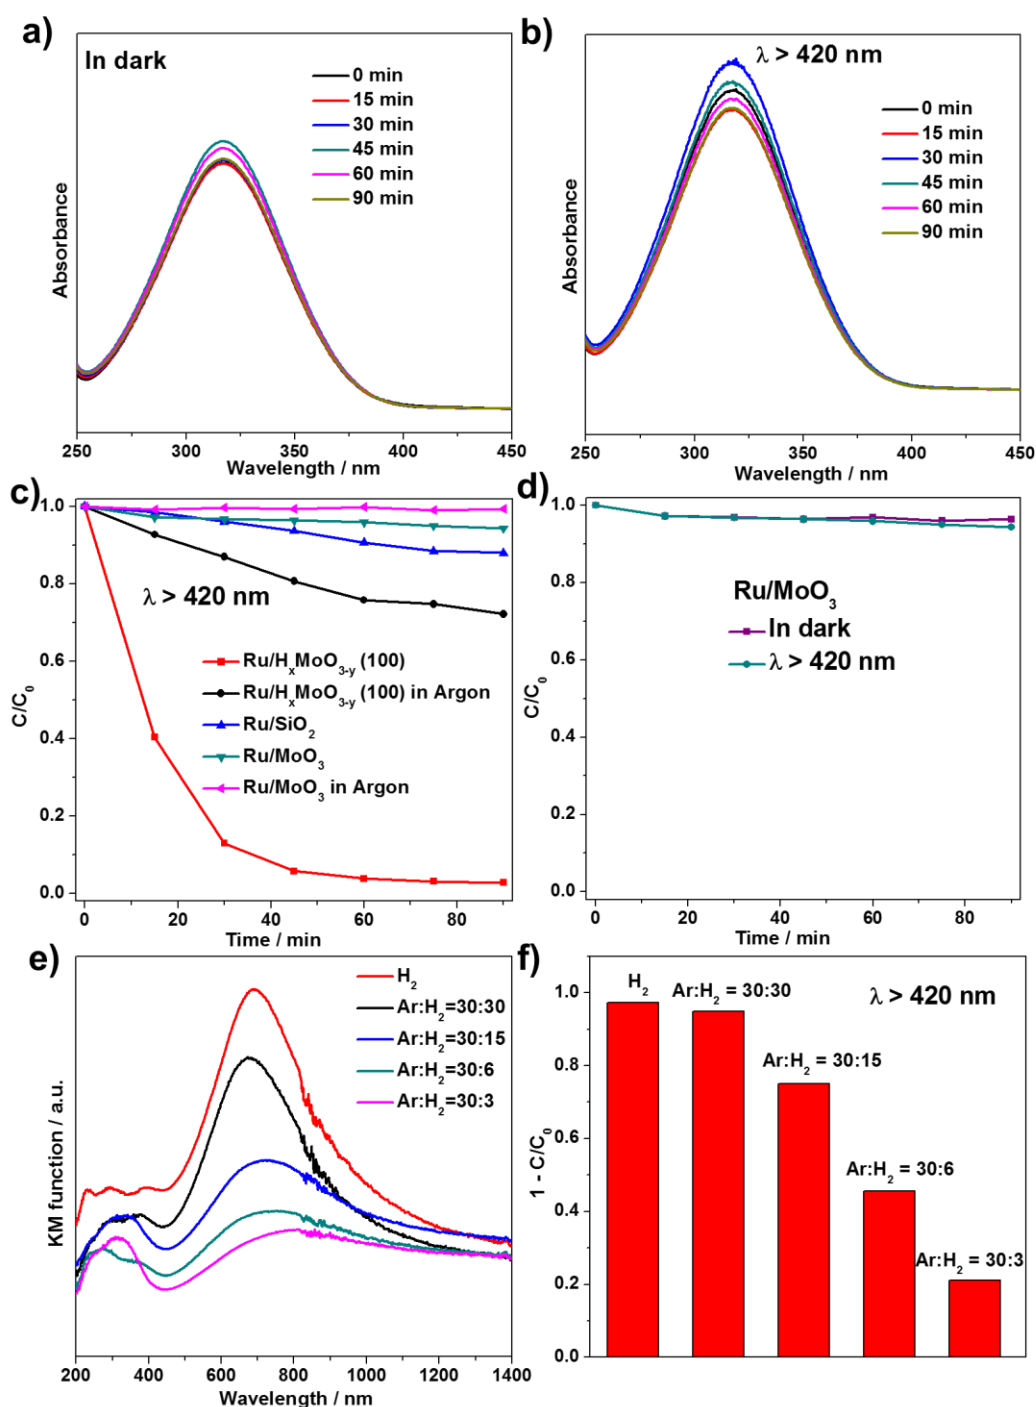

**Figure S9.** Time-dependent evolution of UV-vis absorption spectra of reaction solutions without catalyst a) in the dark and b) under visible irradiation ( $\lambda > 420$  nm). c) Plots of relative concentration of *p*-nitrophenol over Ru/H<sub>x</sub>MoO<sub>3-y</sub> (100) catalyst and reference samples as a function of time. d) Plots of relative concentration of Ru/MoO<sub>3</sub> against the initial point at 317 nm peak for PNP as a function of time. e) UV-vis-NIR diffuse reflectance spectra and f) comparison of catalytic activity in the hydrogenation of *p*-nitrophenol over Ru/MoO<sub>3</sub> samples under different ratios reducing atmosphere of Ar (mL/min) : H<sub>2</sub> (mL/min).



**Table S1** Summary of PNP reduction by using the reported catalysts.

| Catalysts                                 | Reaction condition                       | Hydrogen source                 | TOF/h <sup>-1</sup><br>(mol of PAP/mol of catalyst*h) | Ref.                                                 |
|-------------------------------------------|------------------------------------------|---------------------------------|-------------------------------------------------------|------------------------------------------------------|
| Ru/H <sub>x</sub> MoO <sub>3-y</sub>      | H <sub>2</sub> O, 298.15 K<br>λ > 420 nm | H <sub>2</sub>                  | 2.8                                                   | This study                                           |
| Ru/H <sub>x</sub> MoO <sub>3-y</sub>      | H <sub>2</sub> O, 298.15 K<br>λ > 420 nm | H <sub>2</sub>                  | 0.14                                                  | This study                                           |
| Pd/MoO <sub>3</sub><br>H <sub>2</sub> -RT | H <sub>2</sub> O, 298.15 K<br>λ > 420 nm | NH <sub>3</sub> BH <sub>3</sub> | 6.50                                                  | J. Am. Chem. Soc. 2016,<br>138, 9316-9324.           |
| Cu-Ag-Au<br>alloy                         | H <sub>2</sub> O, 300 K                  | NaBH <sub>4</sub>               | 18.60                                                 | Environ. Sci. Technol. 2016,<br>50, 11263-11273.     |
| Reduced<br>Co <sub>3</sub> O <sub>4</sub> | H <sub>2</sub> O, 303.15 K               | NaBH <sub>4</sub>               | 0.50                                                  | Appl. Catal., B 2017, 209,<br>648-656.               |
| Cu <sub>2</sub> O@h-BN<br>(boron nitride) | H <sub>2</sub> O                         | NaBH <sub>4</sub>               | ~ 0.50                                                | ACS Appl. Mater. Interfaces<br>2014, 6, 14469-14476. |
| Au/HCNM                                   | H <sub>2</sub> O, 295.15 K               | NaBH <sub>4</sub>               | 64                                                    | ACS Sustainable Chem.<br>Eng. 2013, 1, 746-752.      |
| NM/MoS <sub>2</sub> NSs                   | H <sub>2</sub> O                         | NaBH <sub>4</sub>               | 0.20                                                  | Cryst. Growth Des. 2017,<br>17, 3538-3547.           |
| AuNPs-SPEG                                | H <sub>2</sub> O                         | NaBH <sub>4</sub>               | 1.14                                                  | ACS Catal. 2016, 6,<br>5553-5560.                    |
| pf-<br>Au@SiO <sub>2</sub> NPs            | H <sub>2</sub> O, room<br>temperature    | NaBH <sub>4</sub>               | ~ 20                                                  | ACS Catal. 2017, 7,<br>5391-5398.                    |
| Co-colloid                                | THF, 373 K                               | THF                             | 51.84                                                 | Chem. Commun., 2005, 0,<br>2026-2028                 |
| NiPd-colloid                              | THF, 373 K                               | THF                             | ~ 70.77                                               | Chem. Commun., 2005, 0,<br>2026-2028                 |

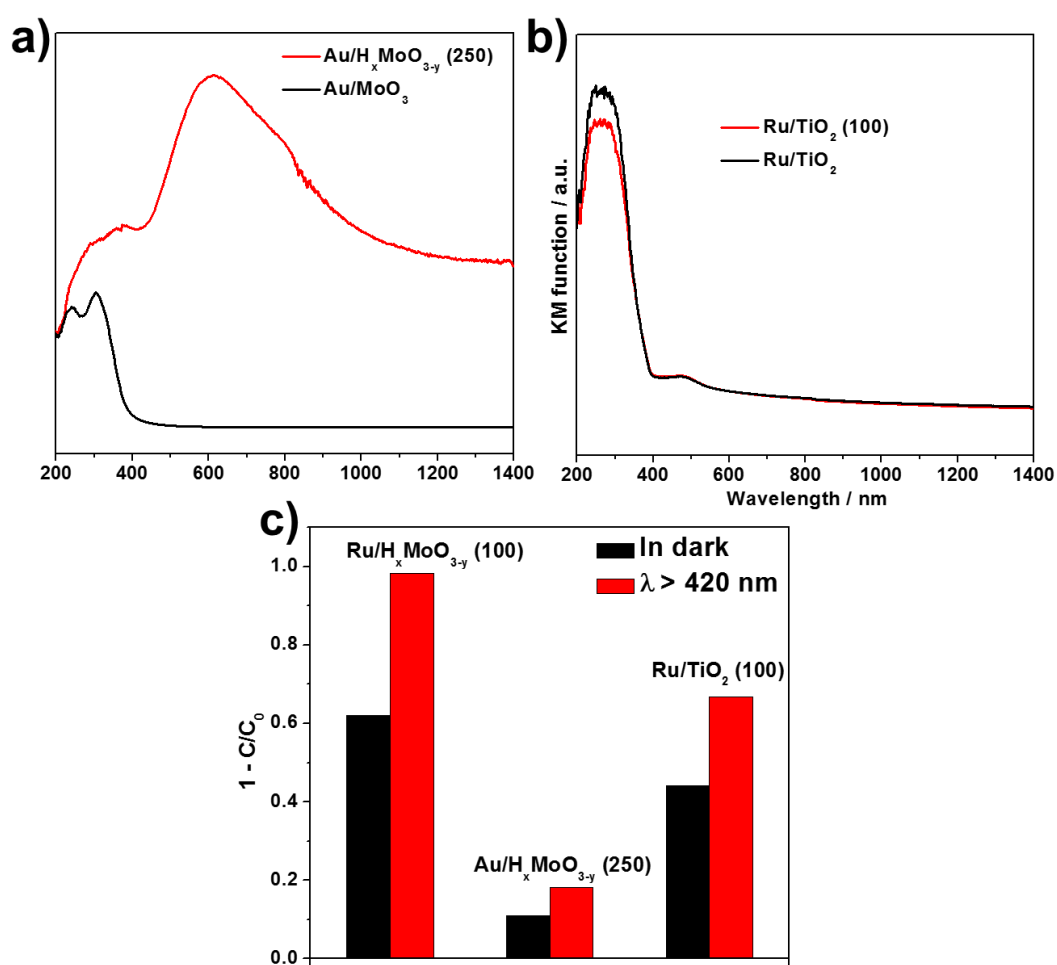

**Figure S10.** UV-vis-NIR diffuse reflectance spectra of a)  $\text{Au}/\text{MoO}_3$  and b)  $\text{Ru}/\text{TiO}_2$  samples before and after  $\text{H}_2$  reduction at different temperatures. c) Comparison of catalytic activity in the hydrogenation of *p*-nitrophenol over  $\text{Au}/\text{H}_x\text{MoO}_{3-y}$  (250) and  $\text{Ru}/\text{TiO}_2$  (100) after 90 min of reaction.

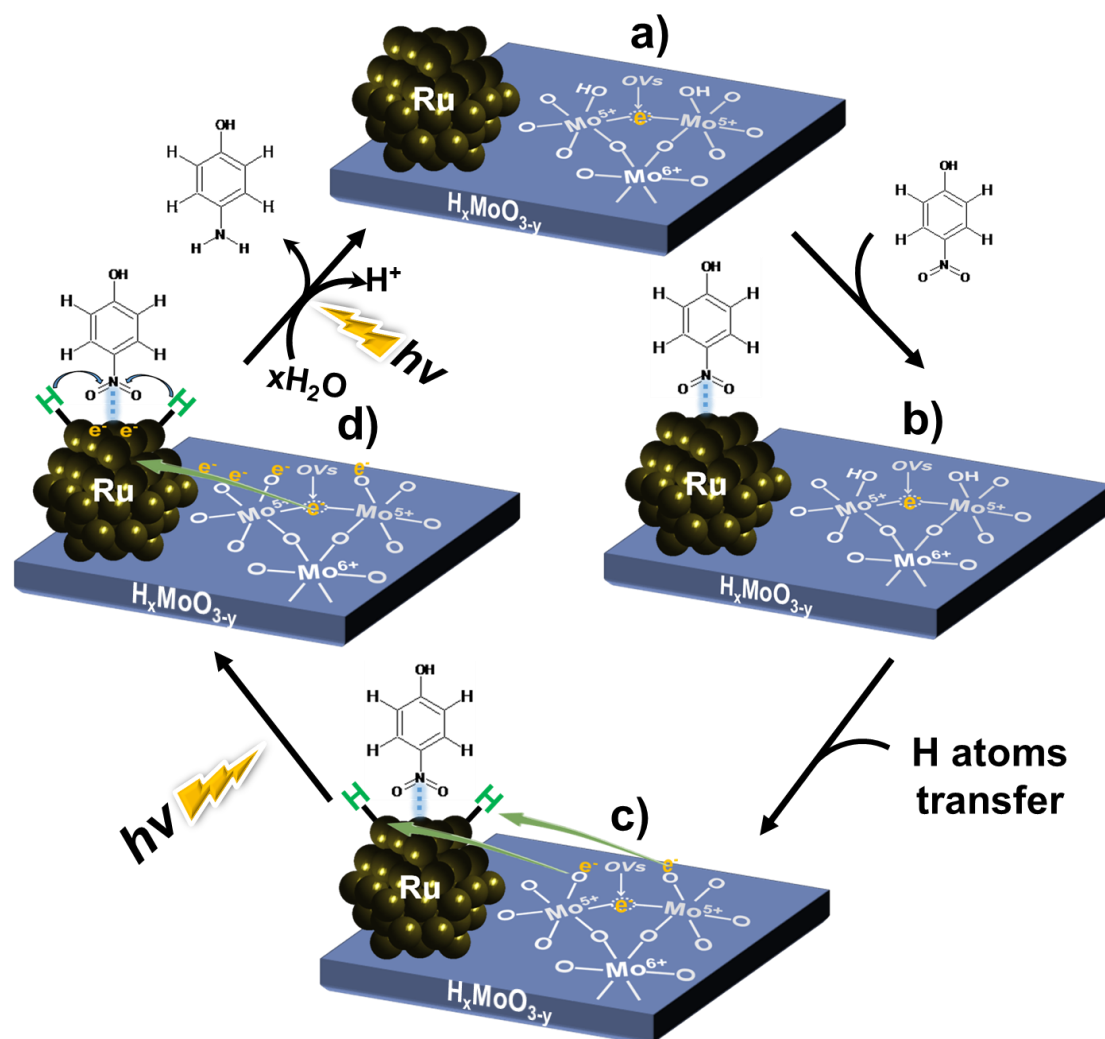

**Scheme S1.** Proposed mechanism of PNP hydrogenation on Ru/H<sub>x</sub>MoO<sub>3-y</sub> (T) without H<sub>2</sub> gas atmosphere.
